# Supplementary material
Source: PubMed Central journal article supplement (PMC2790036)
Supplement: NIHMS119895-supplement-01.pdf [file NIHMS119895-supplement-01.pdf]

## SUPPLEMENTARY MATERIAL

This file contains a detailed description of the theoretical model, one table, 4 supplementary figures, and legends for eight supplementary movies.

### Supplementary theoretical model:

#### a- Viscoplastic model for cell growth in fission yeast

We describe the fission yeast cell as a cylinder of radius  $R$ , and total length  $L$ . The intracellular turgor pressure  $P$ , is assumed to be homogeneous within the cell. The cell wall is also described as a homogeneous elastic material with Young's modulus  $E_{cw}$  and thickness  $h$ , yielding a surface modulus,  $\sigma_{cw} = hE_{cw}$  (Figure 1A). Localized secretion and deposition of new cell wall allows for fission yeast cell growth to occur exclusively at the tips over a domain of length  $R$  [1]. The longitudinal (along the cell long axis) tension in the walls arising from the internal turgor pressure is:

$$T_p = \frac{PR}{2h}, \quad (\text{Eq. S1})$$

In the spirit of the models developed for plants [2-5], we assume that growth appears effectively as a viscoplastic process, where the free growth rate  $v_0 = dL/dt$  is proportional to the strain  $T_p / E_{cw}$  in the wall in excess of a threshold plastic strain  $e_p$ . As growth occurs only in the cap of extension  $R$ , along the longitudinal axis:

$$v_0 = \frac{R}{\tau_V} \left( \frac{T_p}{E_{cw}} - e_p \right), \quad (\text{Eq. S2})$$

where  $\tau_V$  is the viscoelastic time scale that encompasses the precise geometry of the cell tip, putative variations in the Young's modulus at the cell tip and the molecular timing involved in cell growth (polarity based distribution of cell wall remodeling factor).

The total turgor pressure,  $P$ , can thus be represented as the sum of a threshold pressure  $P_c$  needed for wall elongation and the effective turgor pressure  $\Delta P = P - P_c$ , that sets the growth rate.  $P_c$  can be estimated as the pressure needed to reach the plastic yield strain  $e_p$ : imposing  $T_p / E_{cw} = e_p$  yields  $P_c = \sigma_{cw} e_p / R \sim 0.1$  MPa when taking a plausible value  $e_p = 1\%$ , and the values measured of  $\sigma_{cw}$  in this study [6, 7]. Thus, replacing in Eq. (S2) leads to :

$$v_0 = \frac{1}{\tau_V} \frac{R^2}{2h} \frac{(P - P_c)}{E_{cw}} \quad (\text{Eq. S3})$$

### b- Cell buckling

Here, we consider the cell as an elastic rod where the elasticity arises from the cell wall layer. The energetic cost of buckling the cell is not affected by the turgor since it is compensated by the tension in the wall. The threshold force for buckling is thus given by:

$$F_B = \frac{\pi d E_{cw}}{L_T^2}, \quad (\text{Eq. S4})$$

with  $I = \pi h R^3$ , the second momentum of inertia of the cell wall layer, and  $L_T$  the distance between cell tips along the force axis [8]. Replacing with  $I$  and simplifying, Eq. (S4) leads to Eq. (2) presented in the main text.

### c- Force associated with chamber deformation

We compute the elastic force associated with the deformation  $d$  induced by the cell on the chamber by considering the PDMS chamber as an elastic solid being deformed by a cylinder, in that case [9]:

$$F = \frac{8}{3} E_{ch} R d \quad (\text{Eq. S5})$$

where the pre-factor  $8/3$  accounts for the geometrical configuration of a cylinder in contact with an elastic solid.

### d- Cell growth under forces.

Following Eq. S1, if the cell is growing under an external longitudinal force,  $F$  opposing growth (Figure 3B), the tension in the wall is reduced so that:

$$T = T_p - \frac{F}{2\pi R h}. \quad (\text{Eq. S6})$$

If we assume that  $\tau_v$  is independent of the external force, then Eq. (S2) for the growth rate becomes:

$$v(F) = \frac{R}{\tau_v} \frac{T}{E}, \quad (\text{Eq. S6})$$

which, after straightforward simplifications yields:

$$v(F) = v_0 \left( 1 - \frac{F}{\pi R^2 \Delta P} \right). \quad (\text{Eq. S7})$$

Equation S7 describes the change in velocity induced by the presence of an external force. We note that this change described by the ratio  $v/v_0$  does not depend on  $\tau_v$  and is thus independent of the local variations of the cell wall elastic modulus or the precise geometry of the cell .

e- Dynamic evolution of force and growth rate:

In the configuration that we describe in the paper, the force, the velocity and the cell length change over time. The evolution of cell length can be obtained by replacing Eq. (S5) in Eq. (S7), so that:

$$\frac{1}{v_0} \frac{dL(t)}{dt} = 1 - \frac{8 E_{ch} R}{3 \Delta PS} (L(t) - D) \quad (\text{Eq. S8})$$

With  $D$  the microchamber diameter.

Eq. (S8) yields the evolution of cell length as a function of time:

$$L(t) = v_0 \tau_F (1 - e^{-t/\tau_F}) + D , \quad (\text{Eq. S10})$$

where time is measured from the contact with the obstacle. Here we introduce  $\tau_F$ , the characteristic time of growth stalling by the external force:

$$\tau_F = \frac{\Delta PS}{\frac{8}{3} E_{ch} R v_0} \quad (\text{Eq. S11})$$

The cell elongation follows an exponentially saturating behavior similar to the one we observe experimentally on Figure 3C. The force-velocity relation follows in turn a linear behavior described by Eq. (S7). This description allowed to match the behavior observed in all chambers (Figure 3C).

f- Dynamic of cell buckling:

The last set of experiments consist of growing cells and studying whether they can buckle under the force of their own growth. The cell usually grows to the chamber border, slows down very rapidly and stop elongating for a given time, after which the cell buckles. By analyzing cells of different length, we saw that this delay before buckling,  $\Delta t$ , was inversely correlated with cell length. During the stalling phase, the cell is growing at a fixed length  $D$ , and is thus shortened from its reference length  $L$  by an amount  $d=L-D$ , so that the cell is submitted to a compressive strain  $d/L$ . This situation can be pictured as a coil that accumulates torsion without elongating. Using the elasticity of the cell wall, we obtain the force applied by the chamber on the cell:

$$F = 2\pi R \sigma_{cw} \frac{l}{L}, \quad (\text{Eq. S12})$$

Using the growth velocity  $v=dd/dt$  and replacing in Eq. (S9) we obtain the external force evolution during the period of stalling ( $0 < t < \Delta t$ ):

$$\frac{dF}{dt} + \frac{F}{\tau} = \frac{\Delta PS}{\tau}, \quad (\text{Eq. S13})$$

with a time-scale  $\tau = \frac{L}{R} \tau_v$  ( $L$  is the cell length at buckling and we consider  $l \ll D, L$ ).

The force exponentially relaxes to a maximum force equal to  $\Delta PS$ :

$$F_B = \Delta PS \left(1 - e^{-\left(\frac{\Delta t}{\tau}\right)}\right), \quad (\text{Eq. S14})$$

Using values of  $v_0$  and  $\Delta P$  from the experiments and replacing in Eqs. (4,5), we expect  $\tau$  in the range 5-30 min. The measured delays  $\Delta t$  range from 5-30 min and thus plotting  $F_B$  as a function of  $\Delta t$  should remain almost linear at all  $\Delta t$  which is consistent with observations (Figure 4C).

### Supplementary Table S1: Strain List

|        |          |                                          |
|--------|----------|------------------------------------------|
| FC1234 |          | leu1-32:SV40:GFP-atb2[leu1+]             |
| NM11   | cdc25-22 | leu1-32:SV40:GFP-atb2[leu1+]             |
| NM33   | cdc25-22 | JK148-nmt41-GFP-CHD:leu1+                |
| NM183  | cdc25-22 | gpd1::kanMX leu1-32:SV40:GFP-atb2[leu1+] |
| NM185  | cdc25-22 | sty1-GFP::kanMX                          |
| NM189  | cdc25-22 | leu1-32:nmt::GFP-pap1 [leu1+]            |
| NM209  | cdc25-22 | for3::kanMX leu1-32:SV40:GFP-atb2[leu1+] |

## Supplementary References

1. Chang, F. (2001). Establishment of a cellular axis in fission yeast. *Trends Genet* *17*, 273-278.
2. Lockhart, J.A. (1965). An Analysis of Irreversible Plant Cell Elongation. *Journal of Theoretical Biology* *8*, 264-&.
3. Green, P.B., Erickson, R.O., and Buggy, J. (1971). Metabolic and Physical Control of Cell Elongation Rate - in-Vivo Studies in *Nitella*. *Plant Physiology* *47*, 423-&.
4. Proseus, T.E., Ortega, J.K.E., and Boyer, J.S. (1999). Separating growth from elastic deformation during cell enlargement. *Plant Physiology* *119*, 775-784.
5. Dumais, J., Shaw, S.L., Steele, C.R., Long, S.R., and Ray, P.M. (2006). An anisotropic-viscoplastic model of plant cell morphogenesis by tip growth. *International Journal of Developmental Biology* *50*, 209-222.
6. Proseus, T.E., Ortega, J.K., and Boyer, J.S. (1999). Separating growth from elastic deformation during cell enlargement. *Plant Physiol* *119*, 775-784.
7. Boudaoud, A. (2003). Growth of walled cells: from shells to vesicles. *Phys Rev Lett* *91*, 018104.
8. Landau, L.D., and Lifshitz, E.M. (1959). *Theory of elasticity*, (MIR Moscow).
9. Johnson, K.L. (1987). *Contact Mechanics*, (Cambridge U. Press).

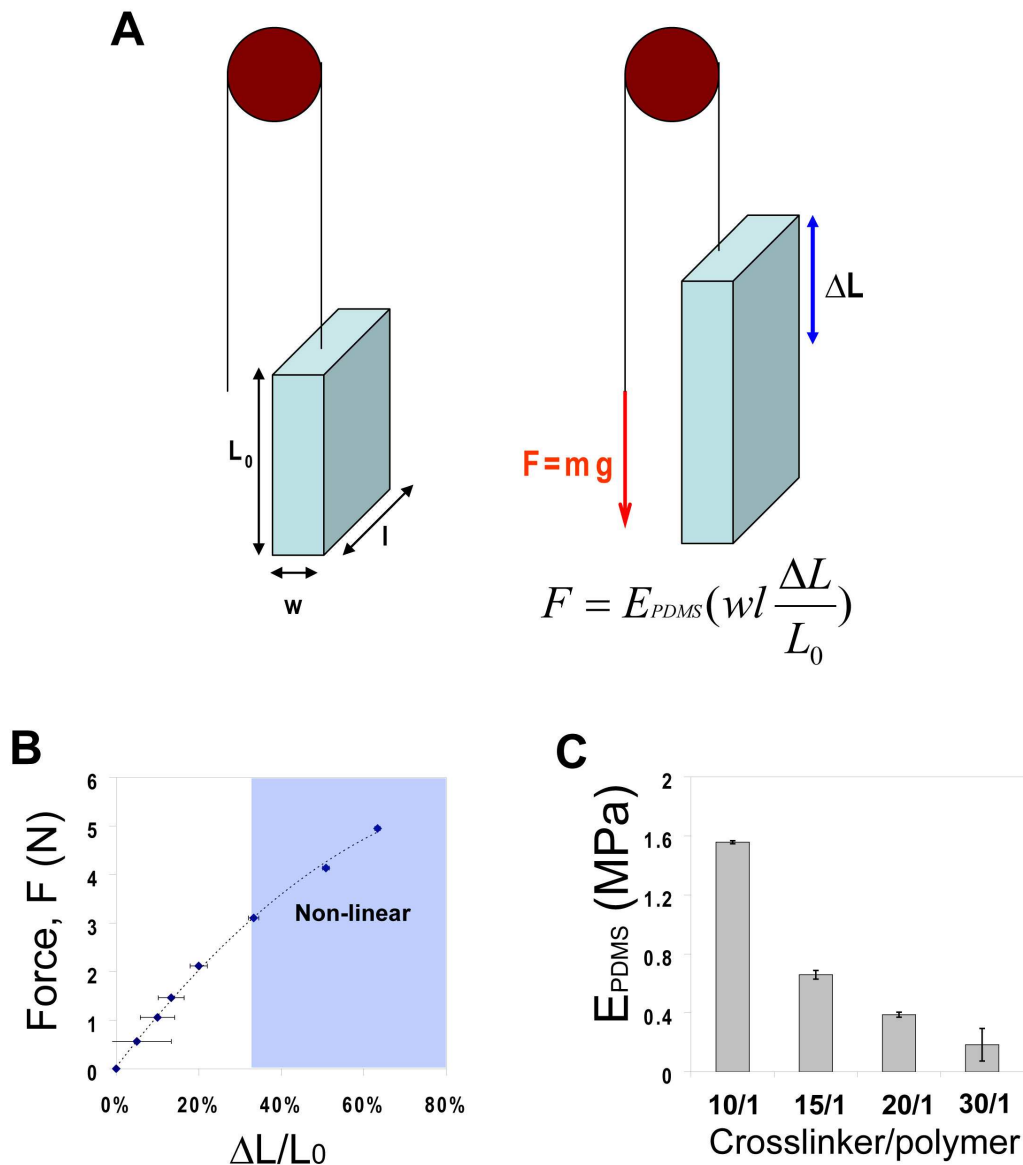

## Figure S1

### Figure S1 Tuning the elasticity of PDMS chambers

We varied the elasticity of PDMS by altering the ratio of crosslinker/polymer ratio. A) Schematic of a strain-stress experimental device used to measure the elasticity of the polymer: A large block of PDMS (typically 10cm\* 4cm\*1 cm) is attached to a fixed table at the bottom and to a rope at the top. The rope is connected to a basket through a pulley. Increasing weights are placed in the basket and the deformation is measured. B) Plot of the force as a function of the relative deformation of the PDMS block. Small deformations (up to 30%) are linear and allow for an estimate of the Young's modulus. For very large deformations, we can observe a saturation corresponding to a non-linear elastic response of the polymer. Error bars represent imprecision in the deformation measurements. C) Young's modulus of the PDMS as a function of the crosslinker/polymer ratio. Error bars represent standard deviations.

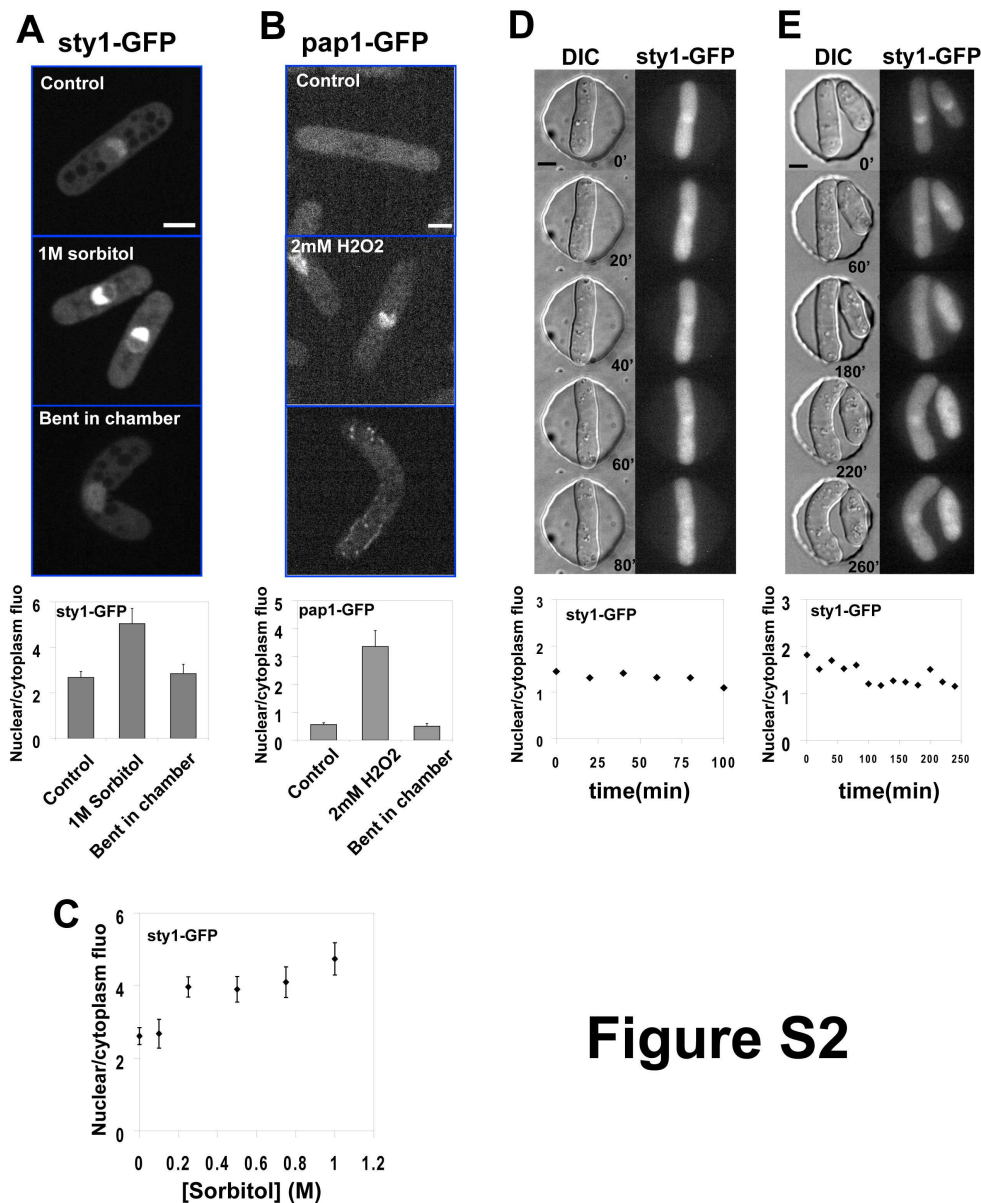

**Figure S2**

**Figure S2 Bending and growing cells under force does not induce a strong stress response.**

As markers of cellular stress, we imaged sty1-GFP and GFP-pap1. Both proteins are largely cytoplasmic in the absence of stress, and accumulate in the nucleus upon stress. A) Images of sty1-GFP cells (NM185) grown in normal media (control cells), immersed 5 min in 1 M sorbitol (osmotic stress) or bent in the chamber for 15 min in normal media. The graph shows quantification of the nuclear/cytoplasmic fluorescent ratios (n=10 cells/condition). B) Images of GFP-pap1 cells (NM189) in normal media, treated for 5 min in 2mM H<sub>2</sub>O<sub>2</sub> (oxidative stress), or bent in the chamber for 15 min. The graph shows quantification of the nuclear/cytoplasmic fluorescence ratios (n=10 cells/condition). C) Nuclear/cytoplasmic fluorescence ratios of sty1-GFP in cells immersed 5 min in media containing increasing concentrations of sorbitol (n=10 cells for each point). Error bars represent standard deviations. D) Sty1-GFP cells were imaged in time-lapse as they grow and deform a chamber. Graph shows the nuclear/cytoplasmic fluorescent ratio of sty1-GFP as a function of time. E) Time-lapse images of a cell growing and buckling itself in a chamber. Graph shows the nuclear/cytoplasmic fluorescent ratio as a function of time. Scale bar=5μm.



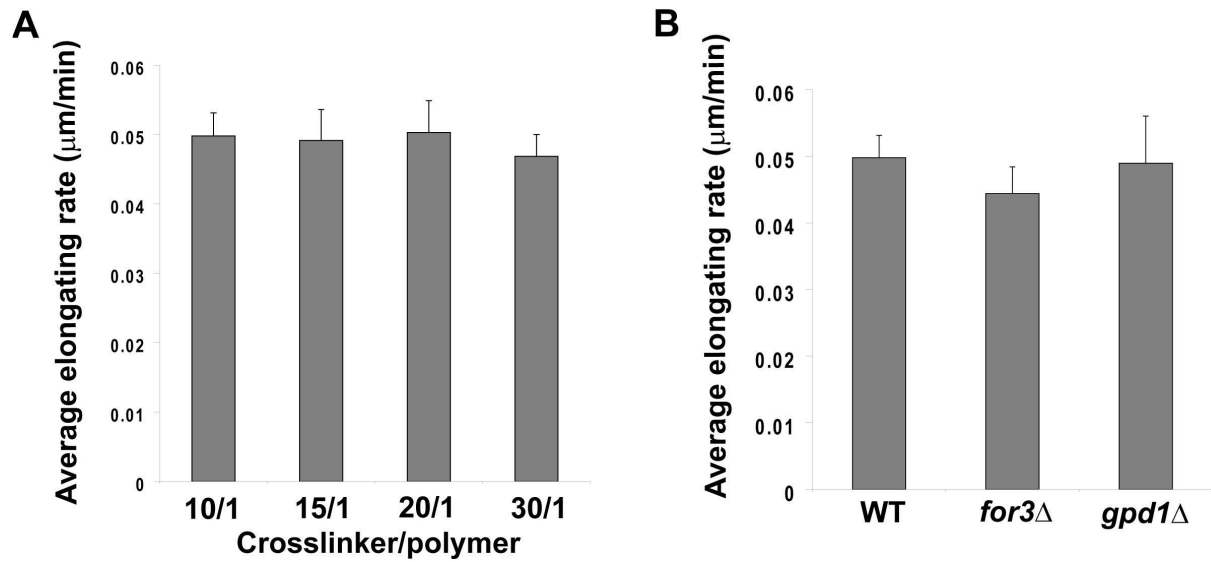

## Figure S3

### Figure S3 Growth rates of unconstrained cells.

A) Free average elongation rates of bipolar wild type cells in very large chambers of different elasticity (n=10 per condition). Error bars represent the standard deviation. The strain is NM11 (*cdc25-22* mutant, grown at 25°C). B.) Free average elongation rates of bipolar wild-type and mutant cells in very large chambers (n=10 per mutant). Error bars represent the standard deviation. The strains are NM11, NM209 and NM183 (all *cdc25-22* mutants, grown at 25°C).

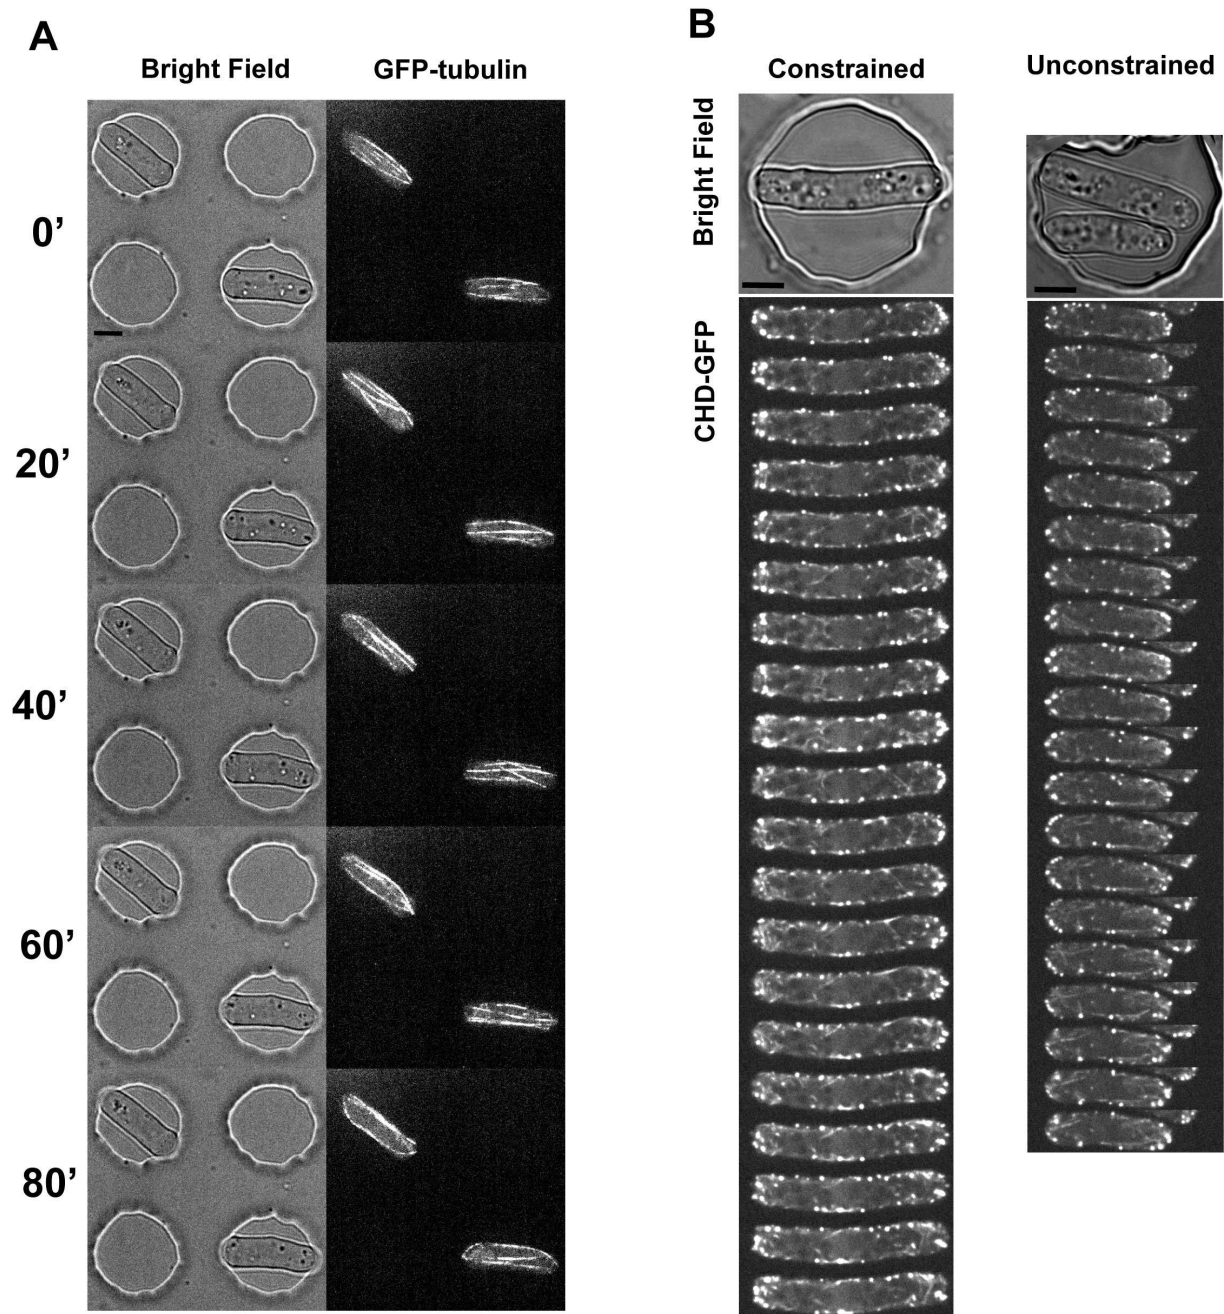

## Figure S4

### Figure S4 Microtubule and actin cytoskeletons are not changed in constrained cells.

A) Time-lapse images of cells expressing GFP-tubulin (NM11) while growing in and deforming soft chambers. Maximum intensity projection confocal images are shown. B) Time-lapse of cells expressing an actin marker CHD-GFP (Calponin homology domain) fusion protein (NM33), under constrained (left) and unconstrained conditions (right). 2s per slice. Scale bar=5 $\mu$ m.

## Supplementary movie legends

**Movie 1** Cells growing in very large chambers (Strain NM11).

**Movie 2** A single cell is being pushed and bent several times in a row into a microchamber by overfocusing the objective. When popping out the hole, the cell immediately recovers its straight shape illustrating the elasticity of the cell wall. (Strain NM11).

**Movie 3** A single cell grows and deforms a soft chamber ( $E_{ch}=0.16\text{MPa}$ ). The deformation of the chamber provides a dynamic measurement of the force. (Strain NM11).

**Movie 4** A single cell grows and deforms a chamber of intermediate stiffness ( $E_{ch}=0.35\text{MPa}$ ), and then buckles when reaching the threshold buckling force. (Strain NM11).

**Movie 5** Wild-type cells immobilized in a microfluidic flow chamber are exposed to a media containing 1M sorbitol. The cells shrivel and then recover within 10-20 min their initial volumes by up-regulating internal turgor. (Strain NM11).

**Movie 6** *gpd1Δ* cells immobilized in a microfluidic flow chamber are exposed to a media containing 1M sorbitol. The cells shrivel and fail to recover their initial volumes, even after 90 min, illustrating a failure in regulating turgor levels. (Strain NM183).

**Movie 7** Cells growing in a stiff chamber ( $E_{ch}=1.5\text{MPa}$ ) and buckling under their own force. (Strain NM11).

**Movie 8** A single cell grows and buckles in a stiff chamber ( $E_{ch}=1.5\text{MPa}$ ), and then divide. Upon septation the daughter cells recover their initial straight shape, illustrating that the buckling transition induced by cell growth is similar to the one induced by pushing the cell with the objective (Movie 1)
